# Supplementary material for: A facile low temperature route to deposit a TiO2 scattering layer for efficient dye-sensitized solar cells
Source: Royal Society of Chemistry journal article supplement (doi:10.1039/c6ra13273a), 2016-01-01
Supplement: c6ra13273a1.pdf [file c6ra13273a1.pdf]

## **Supplementary Information**

### **A facile low temperature route to deposition of TiO<sub>2</sub> scattering layer for efficient dye-sensitized solar cells**

Z. Andaji Garmaroudi<sup>a, †</sup>, M. Abdi-Jalebi<sup>b, †, \*</sup>, M.R. Mohammadi<sup>a, \*</sup>

<sup>a</sup> Department of Materials Science and Engineering, Sharif University of Technology,  
Azadi Street, Tehran, Iran.

<sup>b</sup> Cavendish Laboratory, Department of Physics, University of Cambridge, JJ  
Thomson Avenue, Cambridge CB3 0HE, UK.

\*Corresponding authors: mohammadi@sharif.edu (M.R. Mohammadi) and  
ma571@cam.ac.uk (M. Abdi-Jalebi)

†These authors contributed equally to this work.

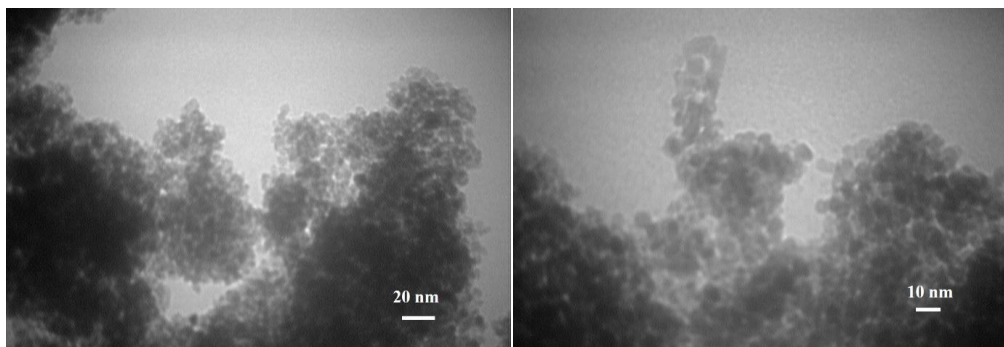

**Figure S1.** Transmission electron microscope images of synthesized  $\text{TiO}_2$  nanoparticles.

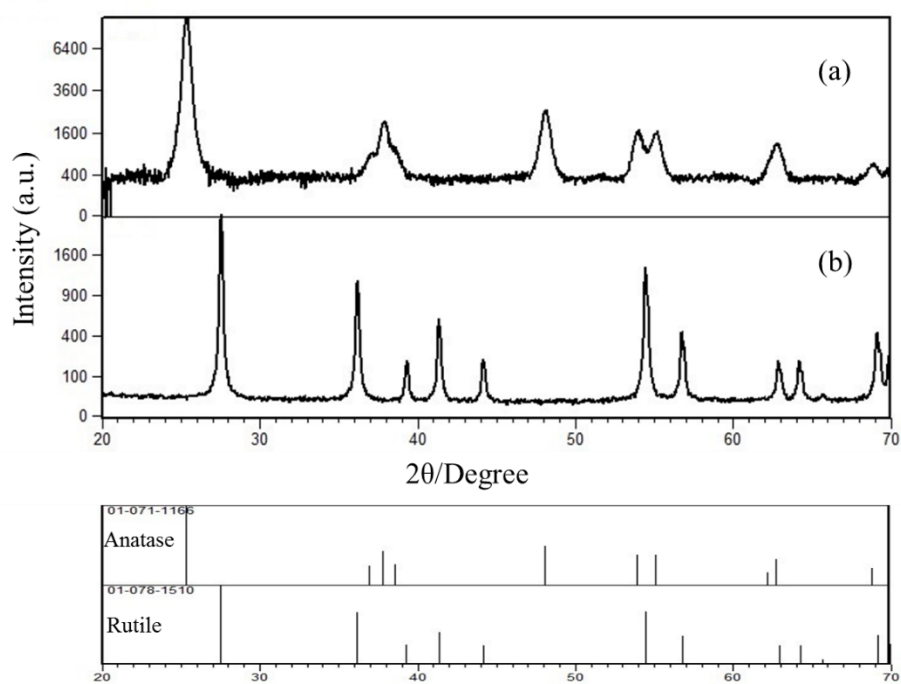

**Figure S2.** XRD patterns of synthesized TiO<sub>2</sub> structures: (a) mesoporous TiO<sub>2</sub> nanoparticles and (b) TiO<sub>2</sub> light scattering layer deposited on a glass substrate.
